# Supplementary material for: Identification of Reference Genes for Precise Expression Analysis during Germination in Chenopodium quinoa Seeds under Salt Stress
Source: MDPI journal article supplement (doi:10.3390/ijms242115878), 2023-11-01
Supplement: s1 [file s1]

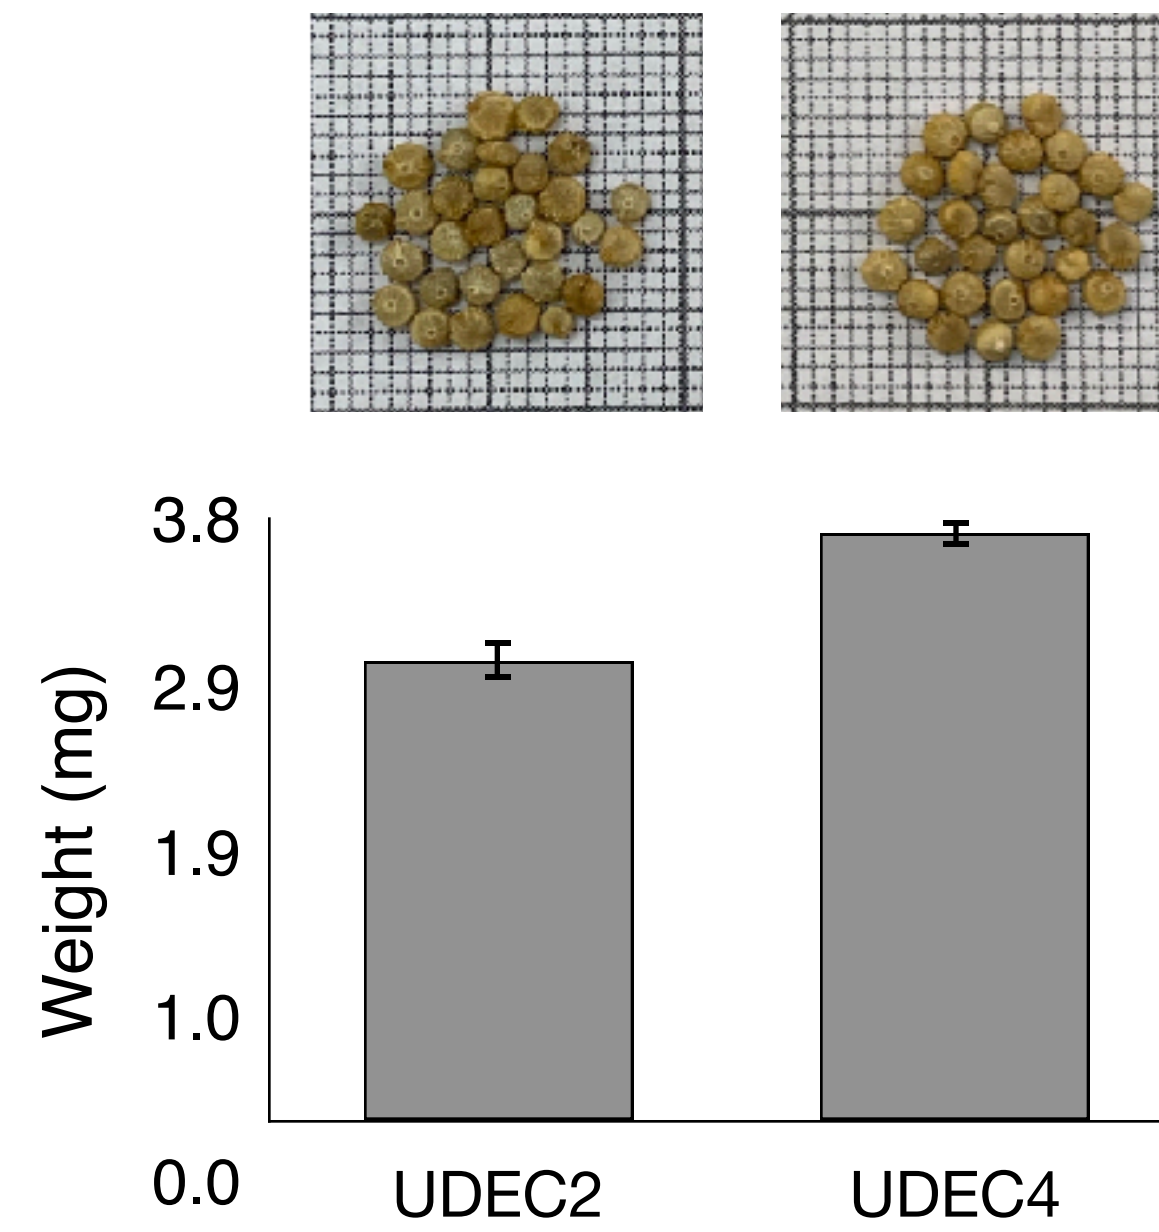

**Figure S1. General aspect and average seed weight of UDEC2 and UDEC4 accessions dry seeds ( $n=100$ ).**

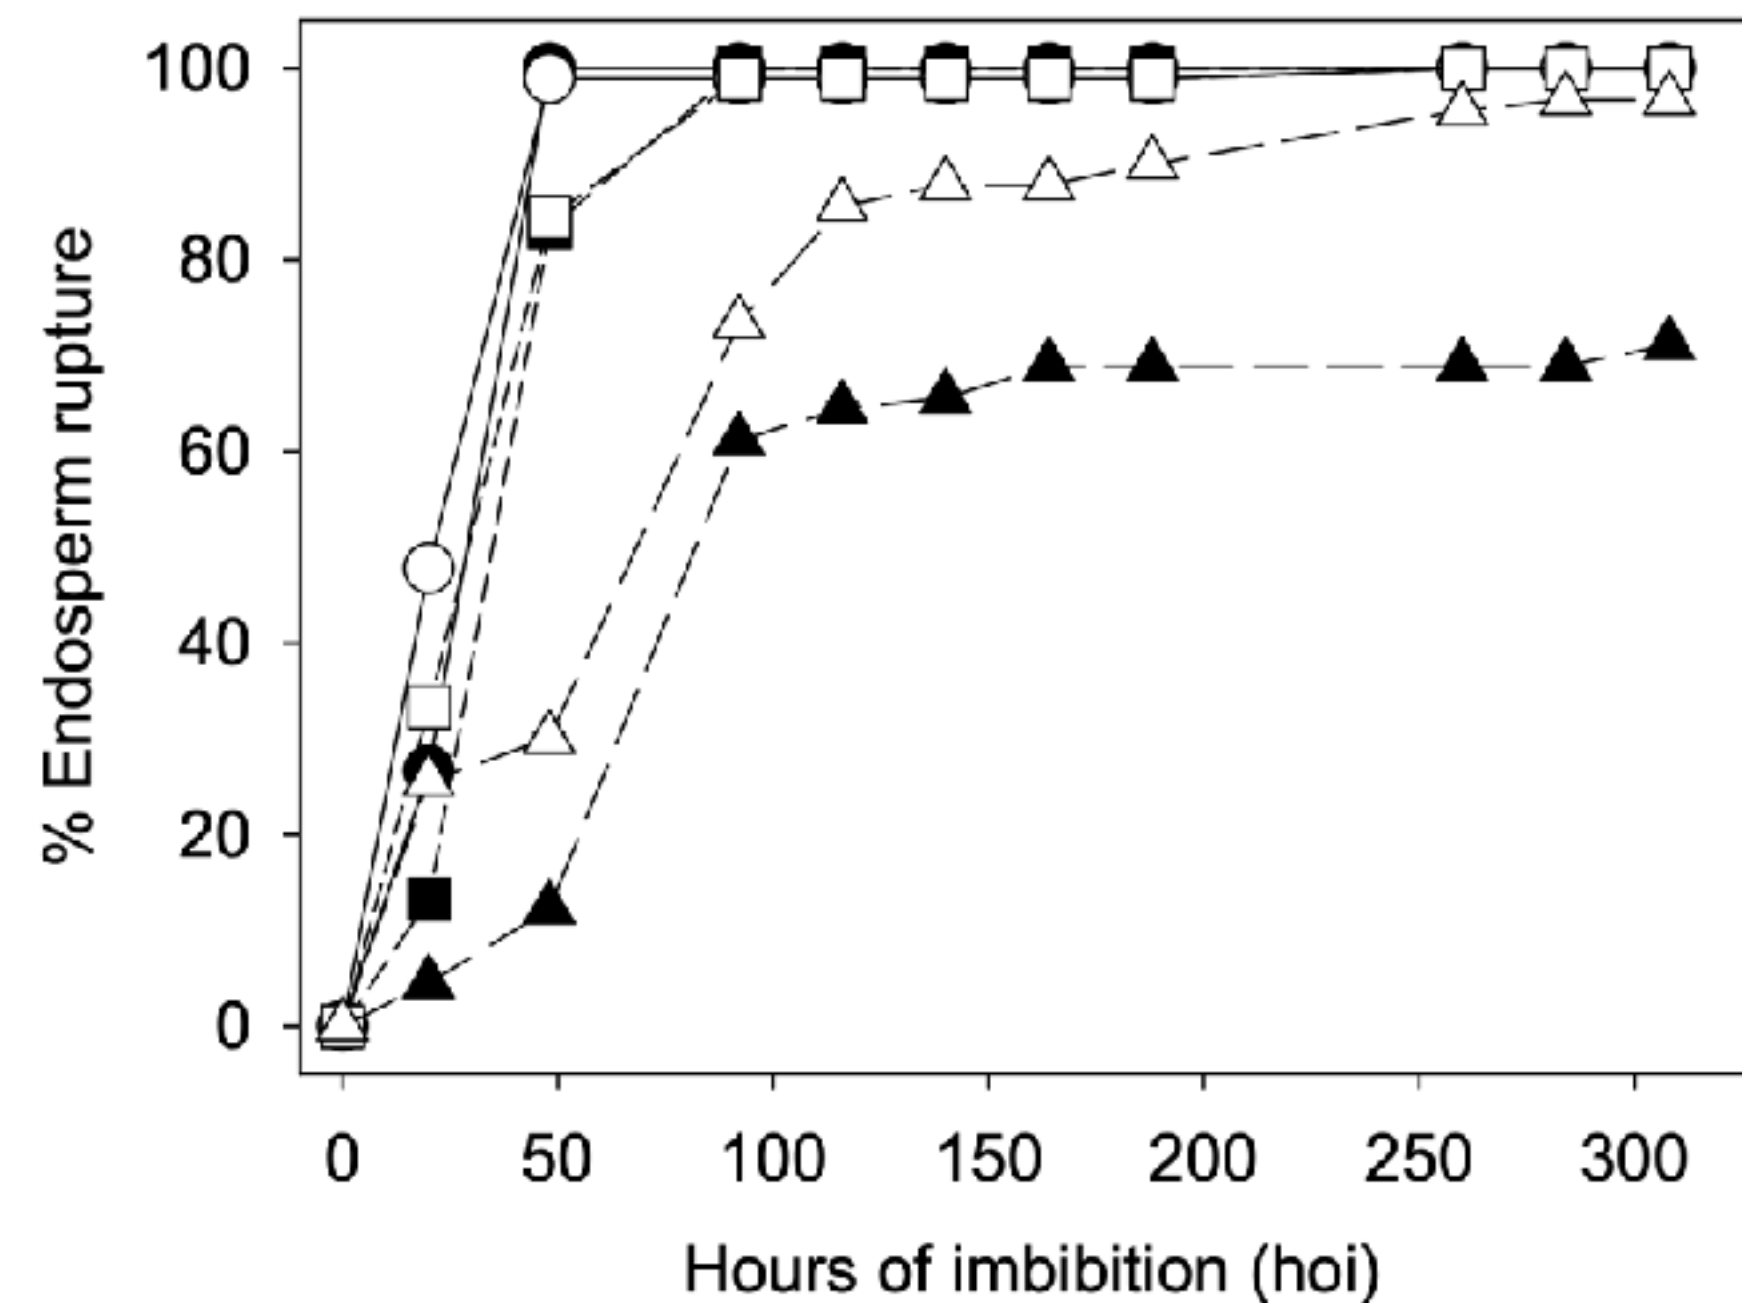

|                         | <u>t<sub>50</sub> (h)</u> | <u>MG (%)</u>        |
|-------------------------|---------------------------|----------------------|
| —●— UDEC2 0 mM NaCl     | 21.1 ± 0.2 <sup>a</sup>   | 100 ± 0 <sup>a</sup> |
| —○— UDEC4 0 mM NaCl     | 20.7 ± 0.8 <sup>a</sup>   | 100 ± 0 <sup>a</sup> |
| --■-- UDEC2 150 mM NaCl | 38.1 ± 5.6 <sup>bc</sup>  | 100 ± 0 <sup>a</sup> |
| --□-- UDEC4 150 mM NaCl | 43.6 ± 0.5 <sup>ab</sup>  | 100 ± 0 <sup>a</sup> |
| —▲— UDEC2 250 mM NaCl   | 85.5 ± 5.0 <sup>d</sup>   | 73 ± 3 <sup>b</sup>  |
| —△— UDEC4 250 mM NaCl   | 57.0 ± 3.9 <sup>c</sup>   | 98 ± 2 <sup>a</sup>  |

**Figure S2. Germination assays of *C. quinoa* two-year-old seeds.** Germination profile of UDEC2 and UDEC4 accessions in absence (control), 150 and 250 mM NaCl. Time to get 50% germination (t<sub>50</sub>) and maximum germination percentage (MG %) are indicated. Percentage of endosperm rupture (ER) is assessed upon germination at 0, 20, 48, 92, 116, 140, 164, 188, 260, 284 and 308 hoi. Data are means ± standard error (SE) of three technical replicates. Statistically significant differences are indicated with different letters (*p*-value ≤ 0.05).

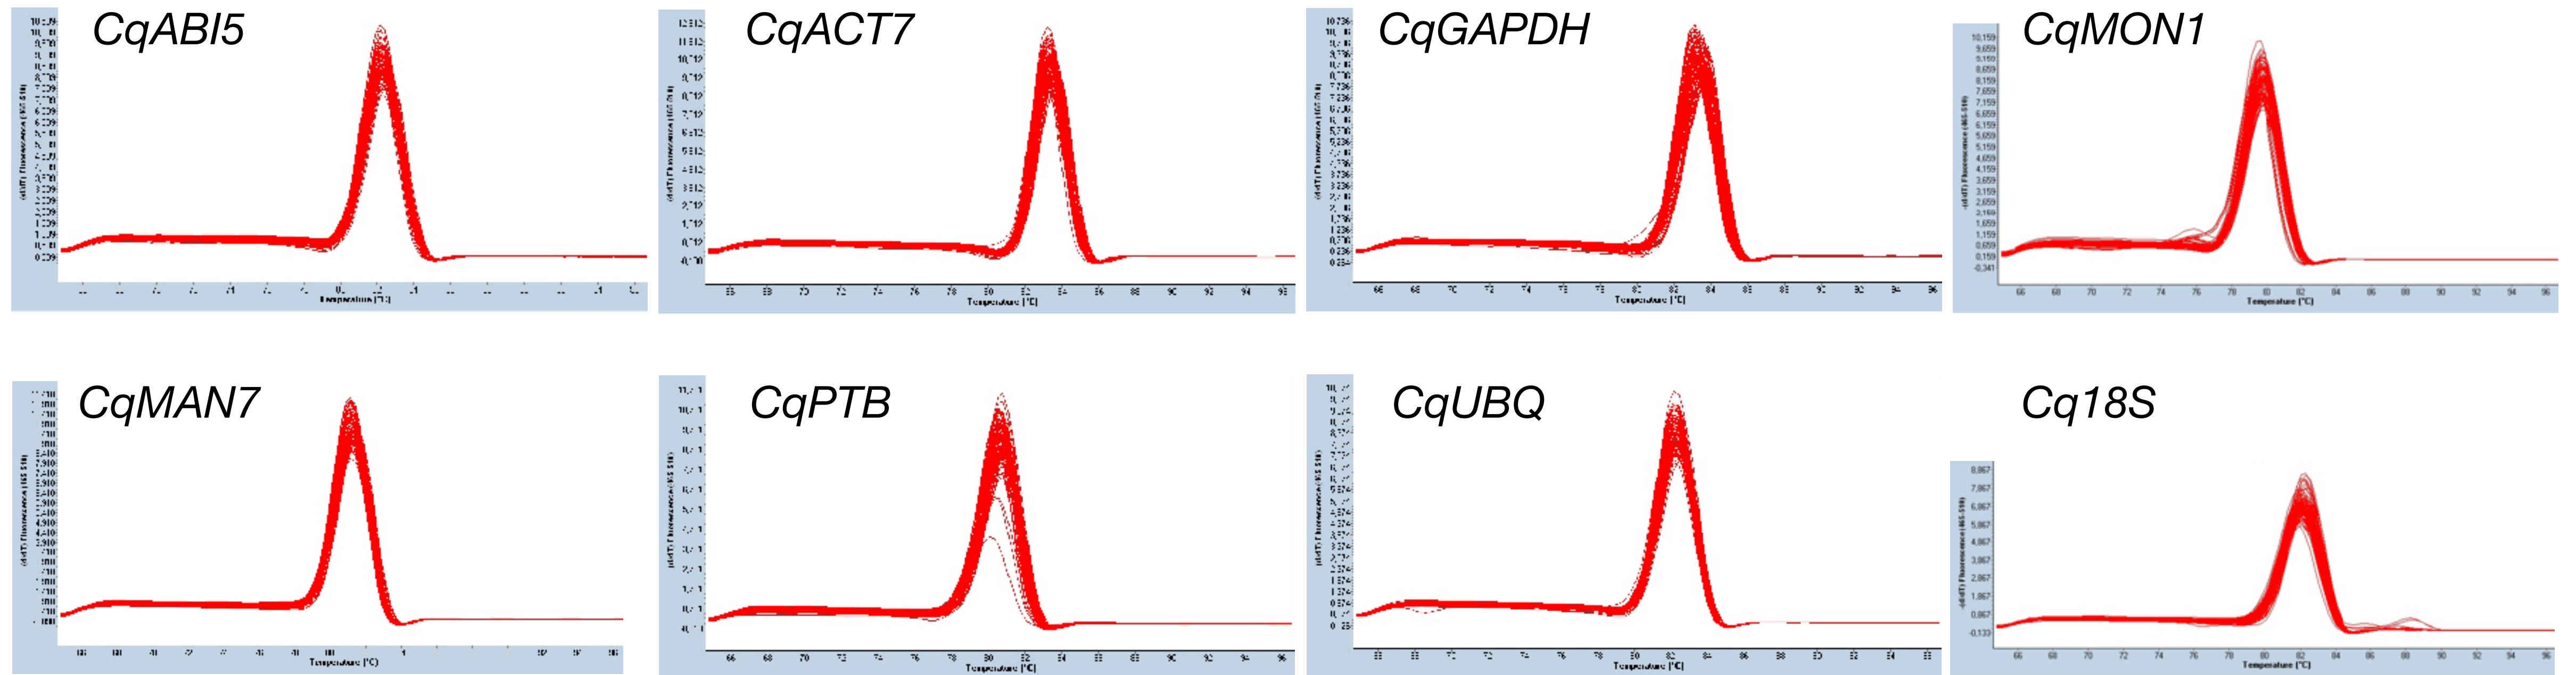

**Figure S3. Melting peaks of the candidate reference and target genes.**

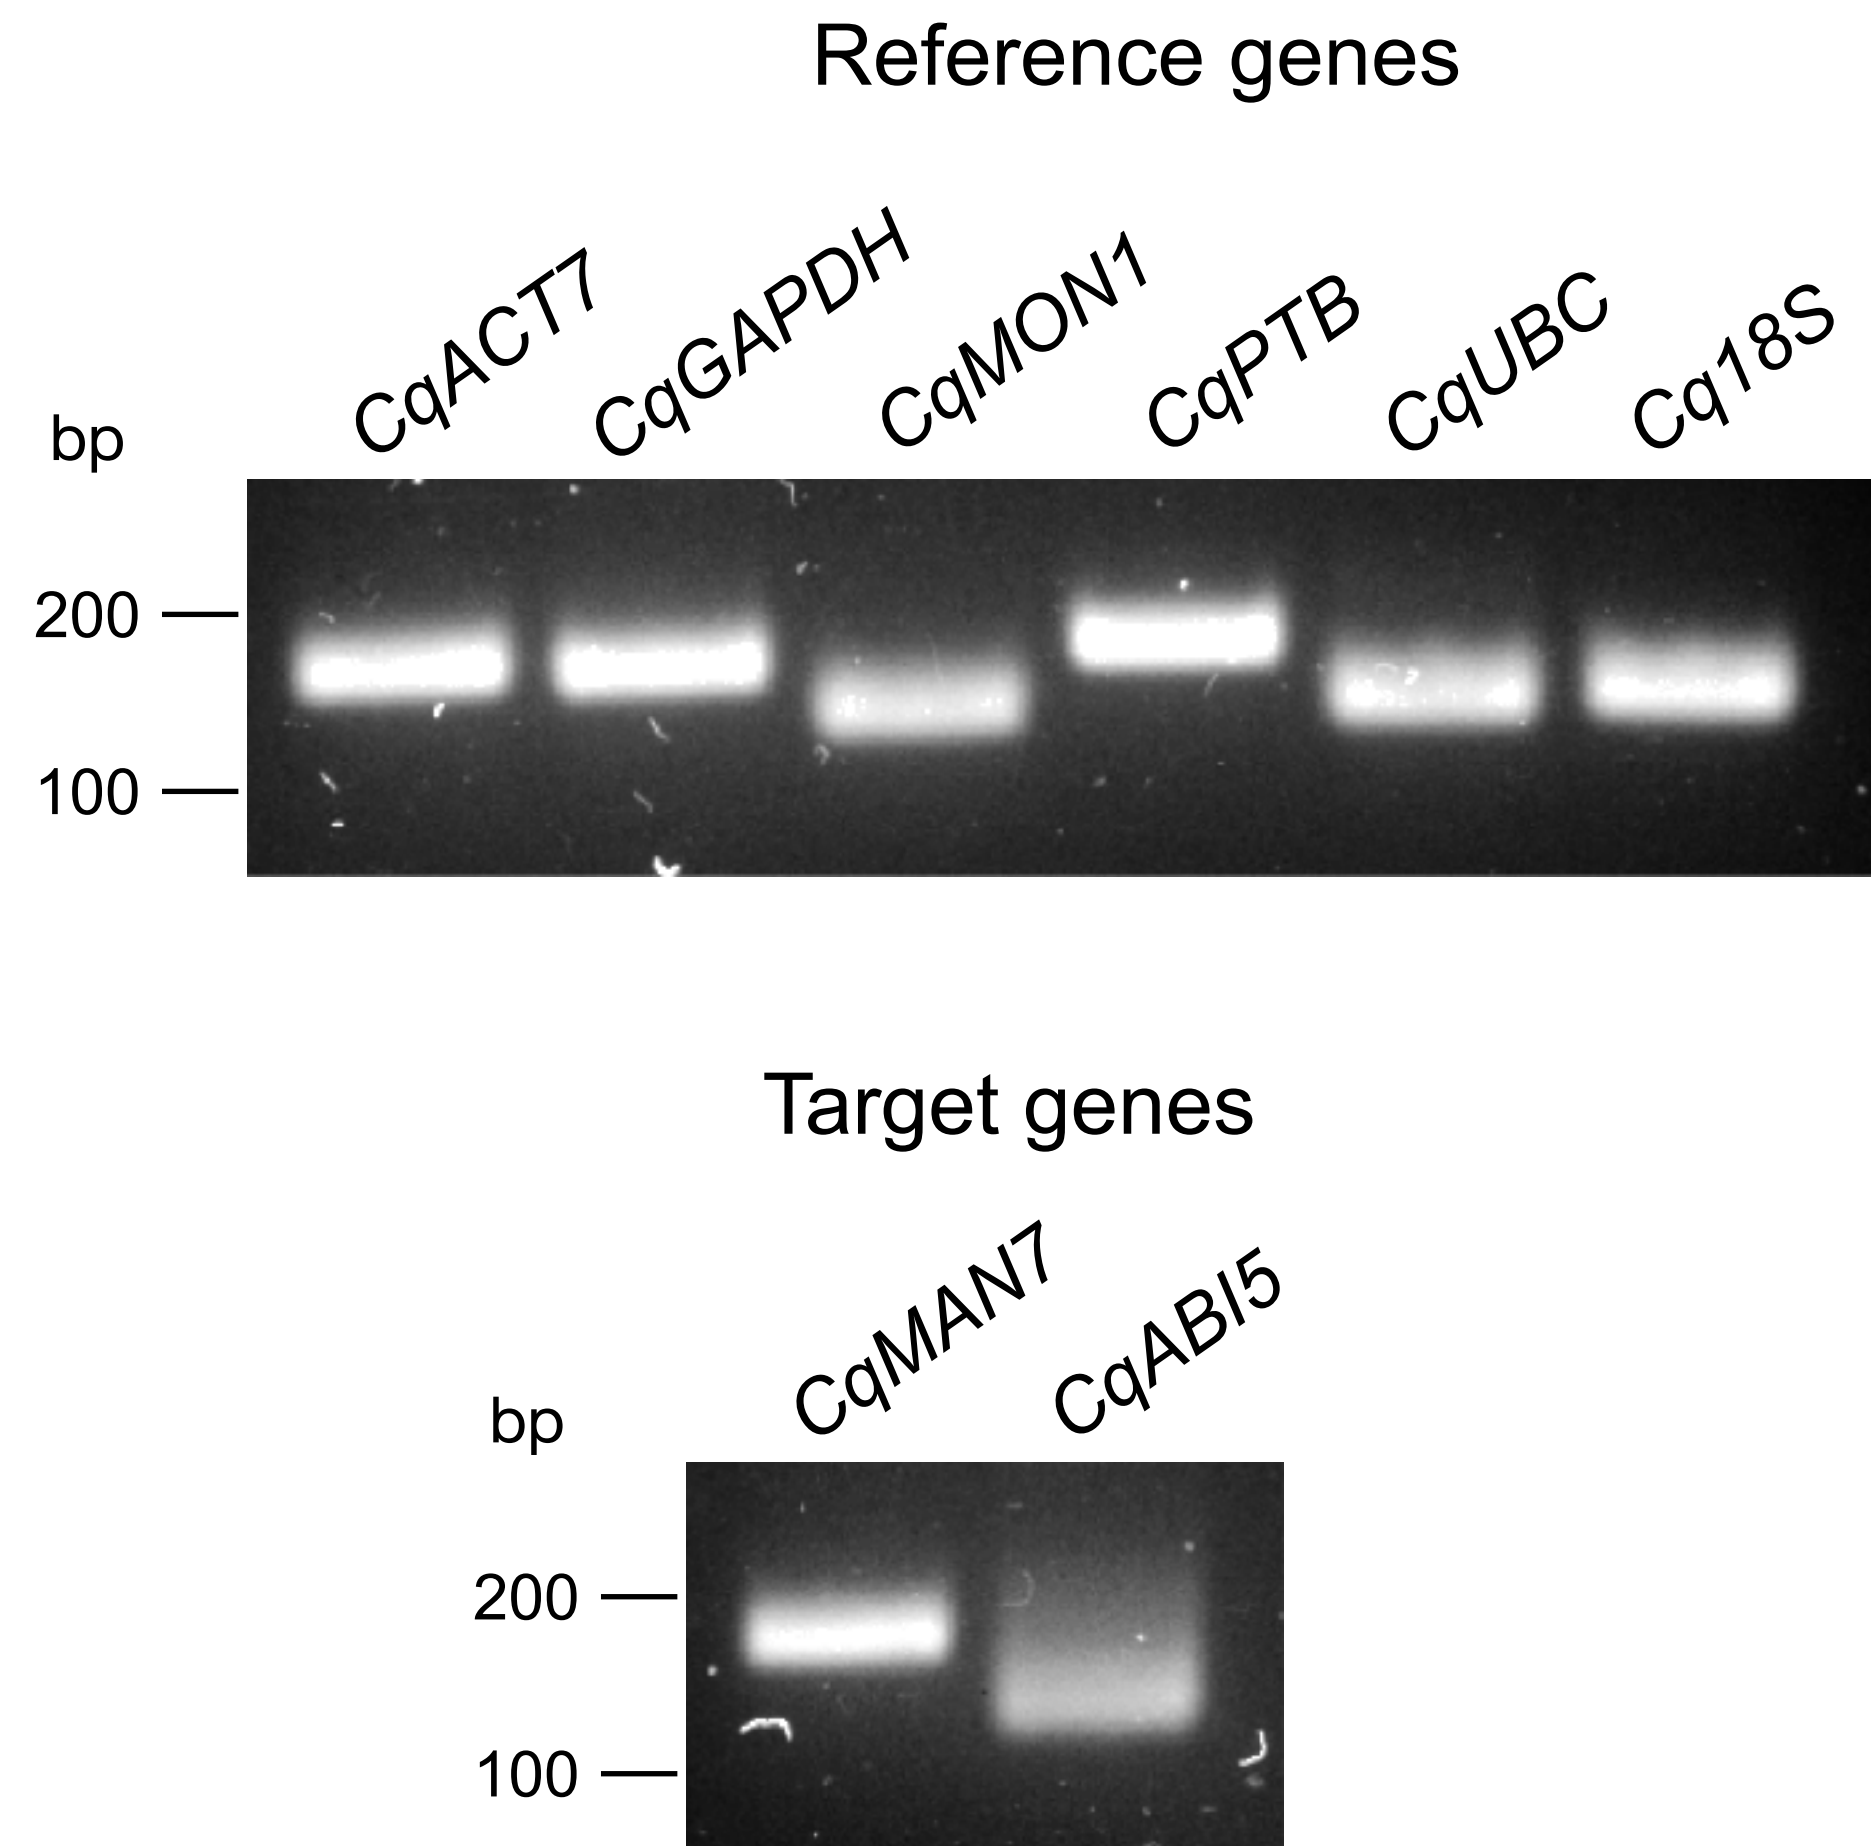

**Figure S4. qPCR amplification products of the candidate reference and target genes.**

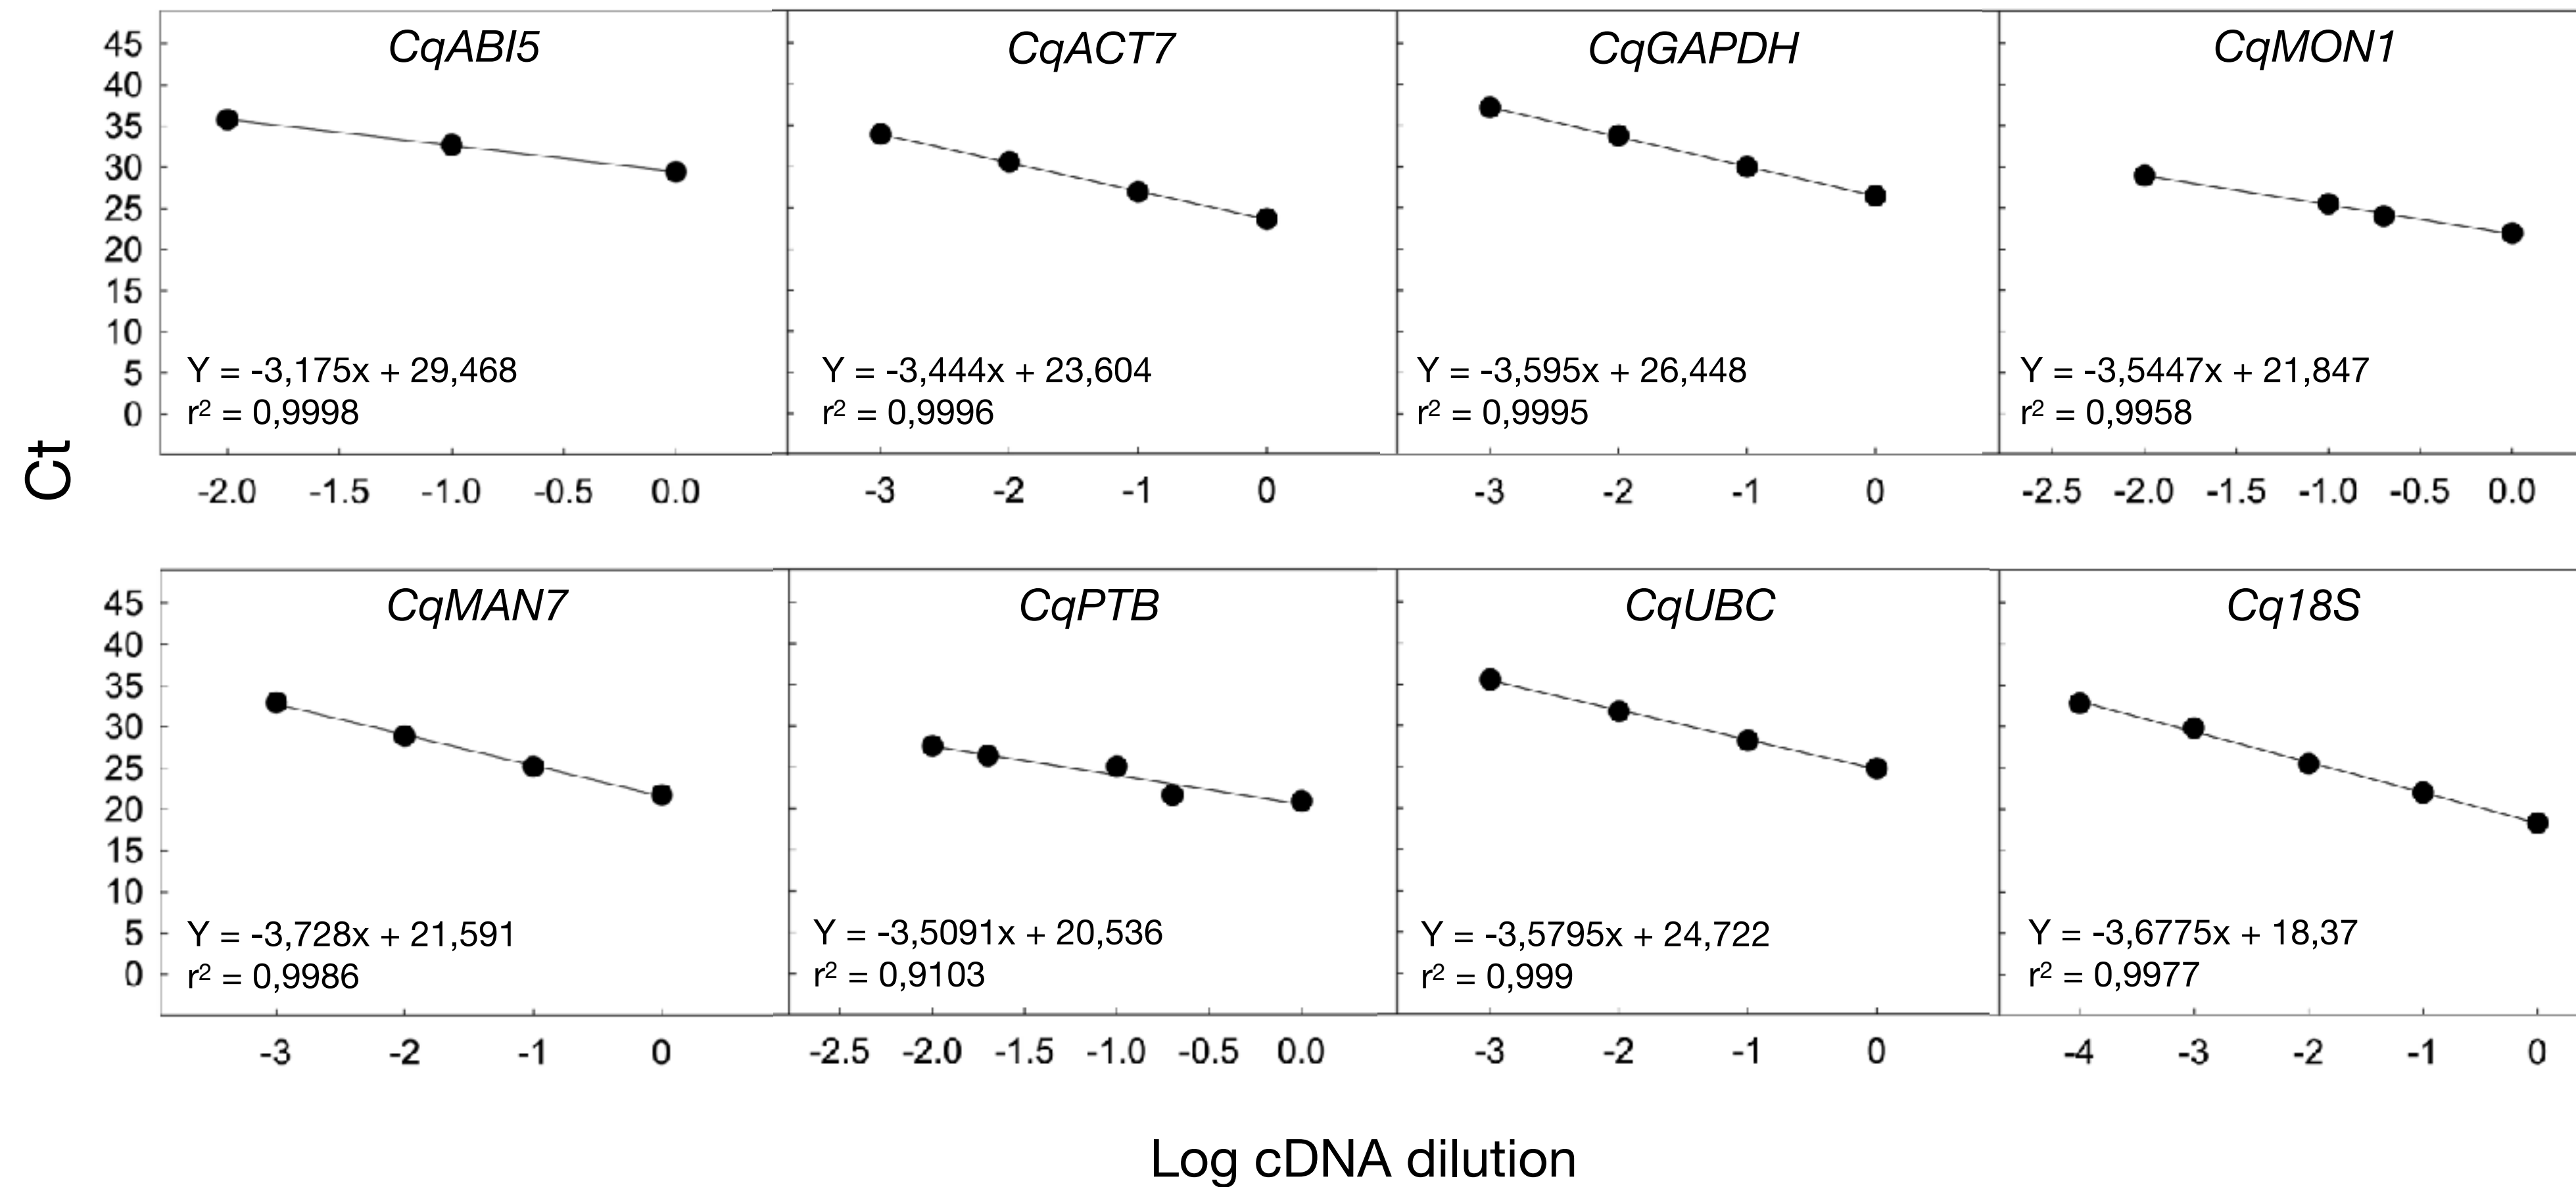

**Figure S5. Primer efficiency calculation.** Ct obtained for each cDNA dilution is plotted (according to section of 3.7 of materials and methods). The regression line and correlation coefficient ( $r^2$ ) are shown.

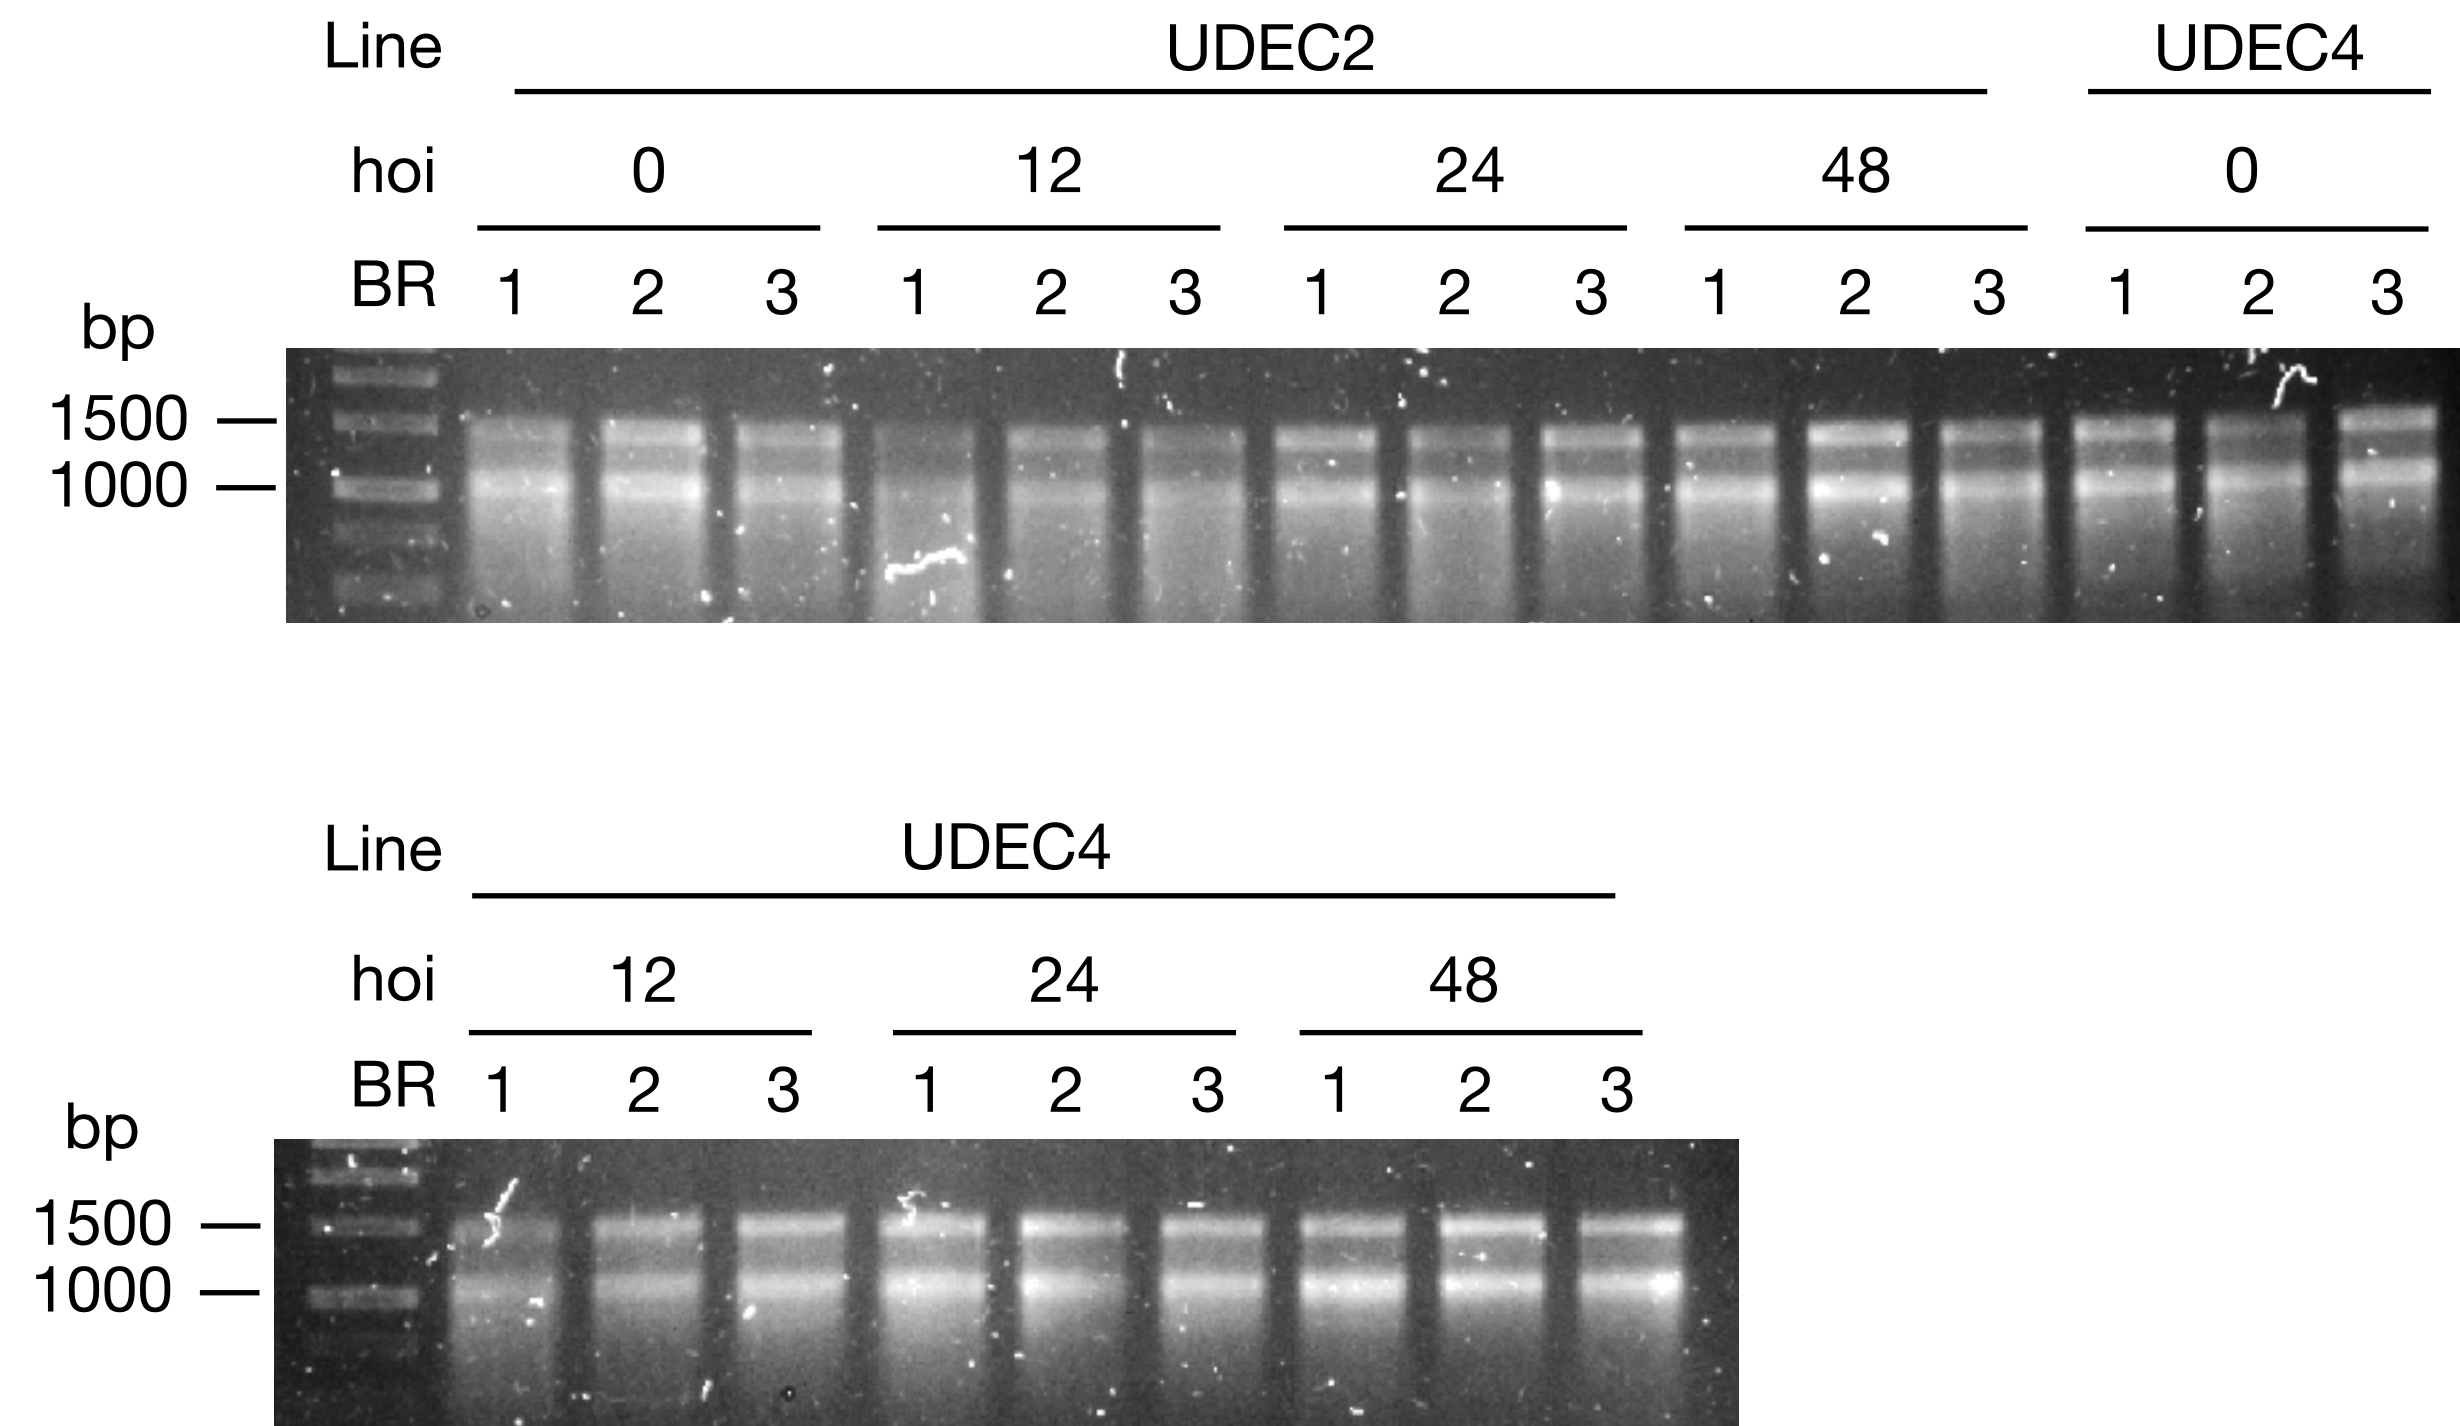

**Figure S6. Integrity of total RNA from UDEEC2 and UDEEC4 seeds.** RNA samples (500 ng) are analyzed in 1% agarose gel. DNA molecular weight is indicated in the first lane. Hoi, hours of imbibition; BR, biological replicate; bp, base pairs.



**(a)** Salt stress

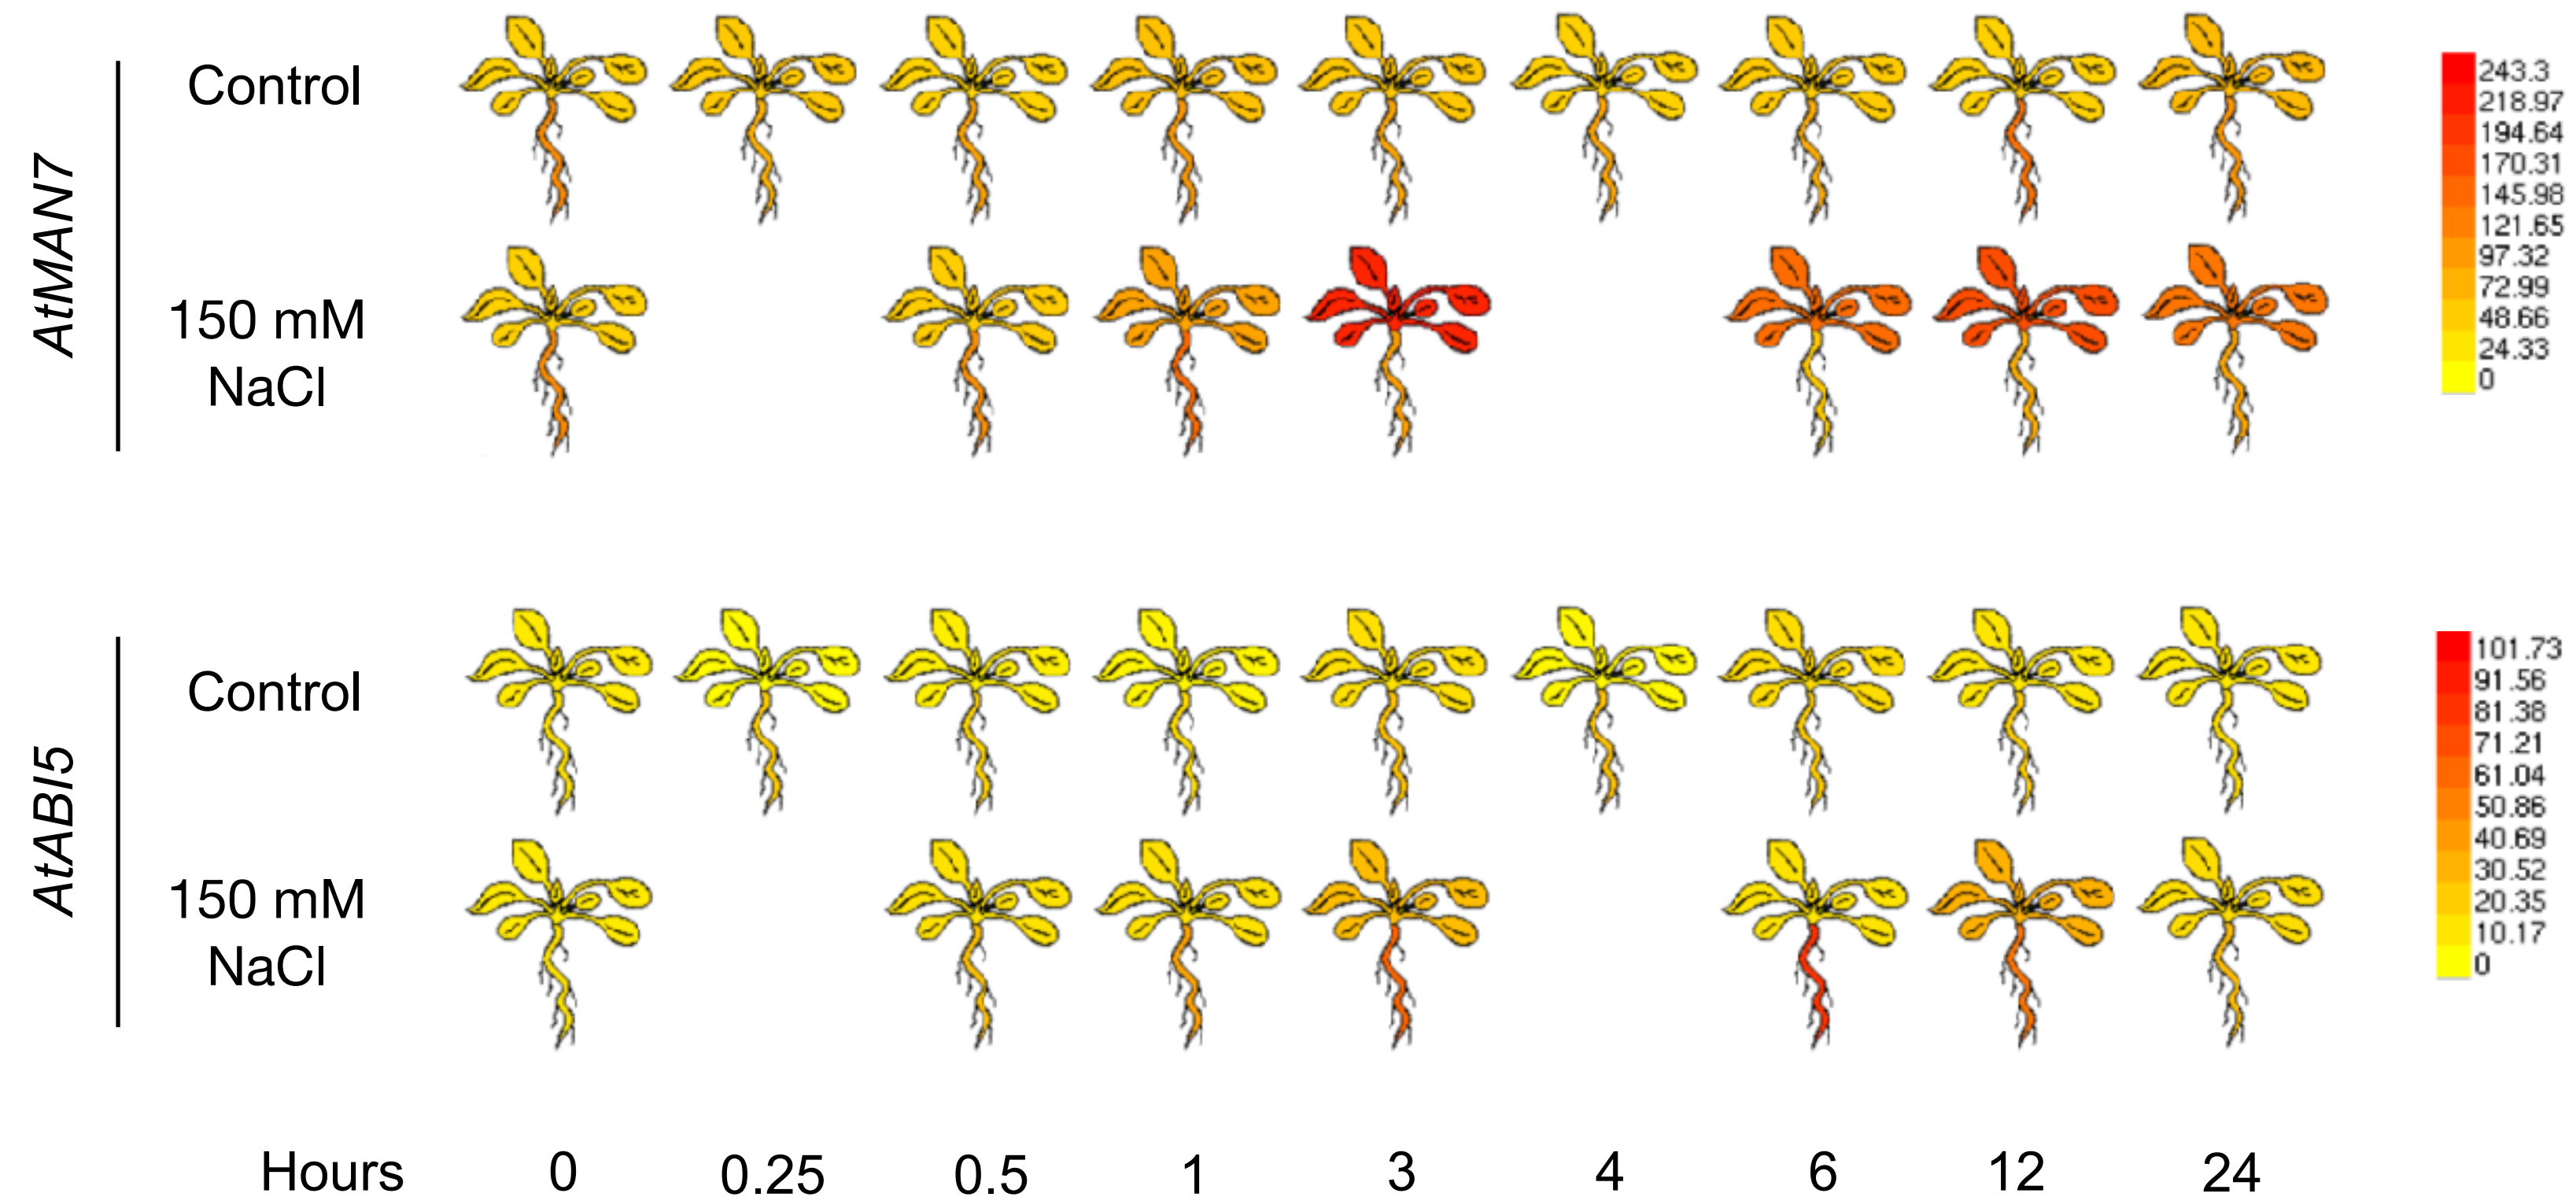

**(b)** Seed germination

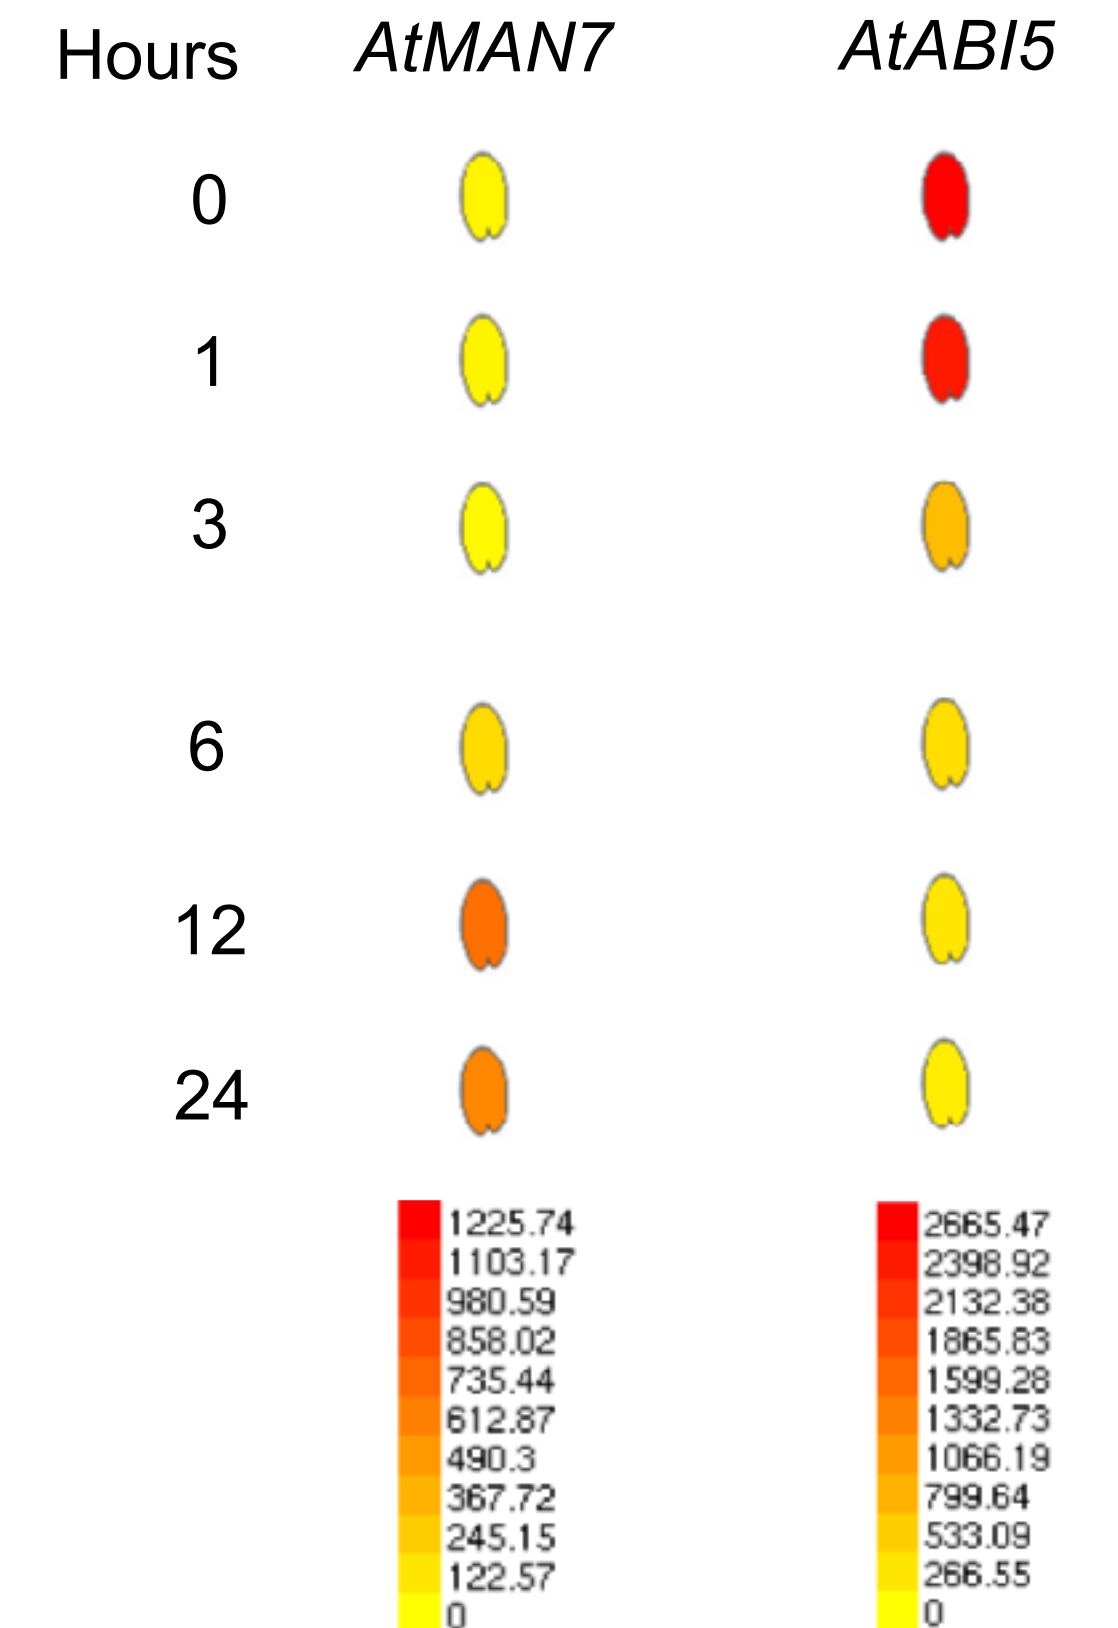

**Figure S7. Pictographic representation of *AtMAN7* and *AtABI5* expression levels in *Arabidopsis thaliana*.** (a) *A. thaliana* seedlings are coloured according to *AtMAN7* and *AtABI5* expression levels in controls (without salt stress) and in 0, 0.25, 0.5, 1, 3, 4, 6, 12 and 24h after salt stress (150 mM NaCl). (b) Expression levels of *AtMAN7* and *AtABI5* in *A. thaliana* seeds upon 0, 1, 3, 6, 12, 24 hoi. Expression data in *A. thaliana* is taken from the University of Toronto Bio-Analytic Resource for Plant Biology (BAR; <https://bar.utoronto.ca/>; accessed June 6th 2023).

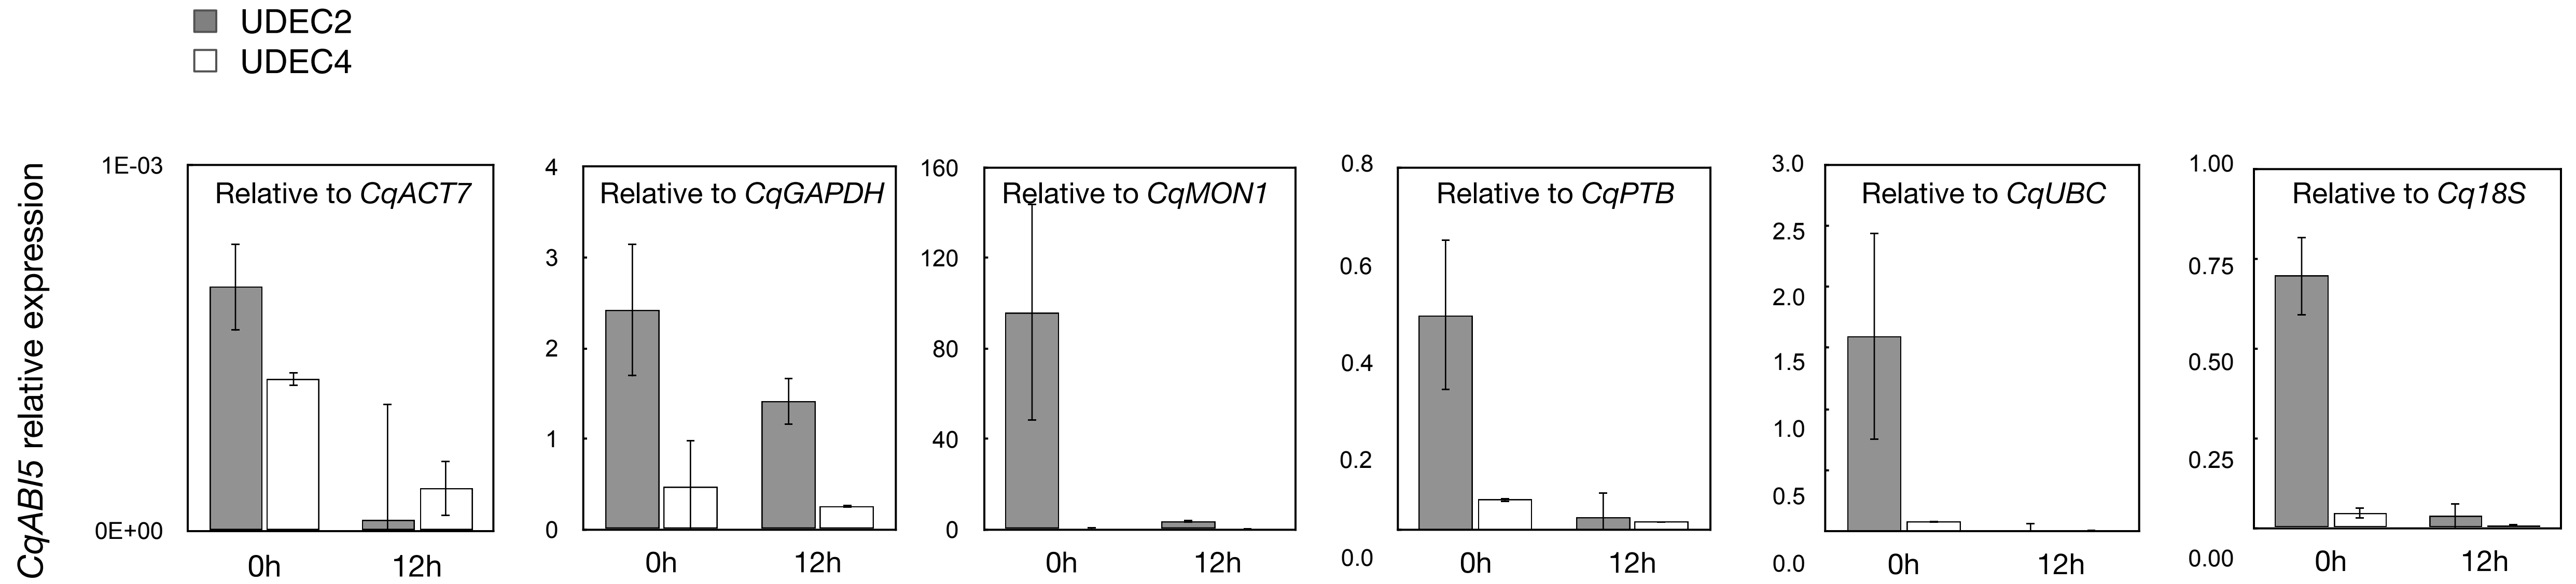

**Figure S8. *CqABI5* expression levels at dry seed stage and 12 hoi in UDEC2 and UDEC4 *C. quinoa* seeds.** Data are means  $\pm$  standard error (SE) of two technical replicates of three biological samples.



**Supplementary Table S1. Concentration of RNA in samples from UDEC2 and UDEC4 upon seed germination in the absence (control: 0, 12, 24, 48 hoi) and presence of 250 mM NaCl (24, 48, 72, 120 hoi) and their A<sub>260</sub>/A<sub>280</sub> and A<sub>260</sub>/A<sub>230</sub> ratios.**

| Quinoa line | Stress      | hoi | Biological replicate | Concentration (ng/ul) | Ratio OD260 / 280 | Ratio OD 260 / 230 |
|-------------|-------------|-----|----------------------|-----------------------|-------------------|--------------------|
| UDEC2       | control     | 0   | 1                    | 2476,3                | 2,21              | 2,46               |
| UDEC2       | control     | 0   | 2                    | 998                   | 2,09              | 2,46               |
| UDEC2       | control     | 0   | 3                    | 2228,3                | 2,21              | 2,46               |
| UDEC2       | control     | 12  | 1                    | 2575,4                | 2,12              | 2,43               |
| UDEC2       | control     | 12  | 2                    | 2474,4                | 2,12              | 2,43               |
| UDEC2       | control     | 12  | 3                    | 2318,6                | 2,19              | 2,45               |
| UDEC2       | control     | 24  | 1                    | 1906,7                | 2,17              | 2,52               |
| UDEC2       | control     | 24  | 2                    | 3427,4                | 2,16              | 2,42               |
| UDEC2       | control     | 24  | 3                    | 1583,2                | 2,15              | 2,51               |
| UDEC2       | control     | 48  | 1                    | 980,4                 | 2,12              | 2,44               |
| UDEC2       | control     | 48  | 2                    | 4389,8                | 2,19              | 2,45               |
| UDEC2       | control     | 48  | 3                    | 436,8                 | 2,06              | 2,47               |
| UDEC4       | control     | 0   | 1                    | 3220,1                | 2,16              | 2,45               |
| UDEC4       | control     | 0   | 2                    | 2619,3                | 2,16              | 2,4                |
| UDEC4       | control     | 0   | 3                    | 2984,4                | 2,17              | 2,44               |
| UDEC4       | control     | 12  | 1                    | 2995,6                | 2,16              | 2,44               |
| UDEC4       | control     | 12  | 2                    | 2733,6                | 2,14              | 2,3                |
| UDEC4       | control     | 12  | 3                    | 1486,9                | 2,14              | 2,51               |
| UDEC4       | control     | 24  | 1                    | 5078,9                | 2,19              | 2,42               |
| UDEC4       | control     | 24  | 2                    | 2594                  | 2,13              | 2,43               |
| UDEC4       | control     | 24  | 3                    | 2458                  | 2,19              | 2,43               |
| UDEC4       | control     | 48  | 1                    | 6665,1                | 2,15              | 2,42               |
| UDEC4       | control     | 48  | 2                    | 5412                  | 2,21              | 2,45               |
| UDEC4       | control     | 48  | 3                    | 2479,2                | 2,15              | 2,49               |
| UDEC2       | 250 mM NaCl | 24  | 1                    | 3220,2                | 2,17              | 2,44               |
| UDEC2       | 250 mM NaCl | 24  | 2                    | 2502,2                | 2,2               | 2,44               |
| UDEC2       | 250 mM NaCl | 24  | 3                    | 2863                  | 2,15              | 2,42               |
| UDEC2       | 250 mM NaCl | 48  | 1                    | 4895,9                | 2,19              | 2,42               |
| UDEC2       | 250 mM NaCl | 48  | 2                    | 3256,7                | 2,19              | 2,45               |
| UDEC2       | 250 mM NaCl | 48  | 3                    | 2235,5                | 2,18              | 2,46               |
| UDEC2       | 250 mM NaCl | 72  | 1                    | 3717,5                | 2,18              | 2,44               |
| UDEC2       | 250 mM NaCl | 72  | 2                    | 5446,9                | 2,22              | 2,42               |
| UDEC2       | 250 mM NaCl | 72  | 3                    | 3818,4                | 2,19              | 2,44               |
| UDEC2       | 250 mM NaCl | 120 | 1                    | 4689,9                | 2,21              | 2,43               |
| UDEC2       | 250 mM NaCl | 120 | 2                    | 6607,6                | 2,17              | 2,41               |
| UDEC2       | 250 mM NaCl | 120 | 3                    | 5637                  | 2,21              | 2,42               |
| UDEC4       | 250 mM NaCl | 24  | 1                    | 3825,2                | 2,18              | 2,43               |
| UDEC4       | 250 mM NaCl | 24  | 2                    | 3702,7                | 2,17              | 2,35               |
| UDEC4       | 250 mM NaCl | 24  | 3                    | 3761,2                | 2,18              | 2,43               |
| UDEC4       | 250 mM NaCl | 48  | 1                    | 5712,5                | 2,22              | 2,42               |
| UDEC4       | 250 mM NaCl | 48  | 2                    | 5179,2                | 2,21              | 2,42               |
| UDEC4       | 250 mM NaCl | 48  | 3                    | 4980,4                | 2,21              | 2,43               |
| UDEC4       | 250 mM NaCl | 72  | 1                    | 4970,3                | 2,2               | 2,41               |
| UDEC4       | 250 mM NaCl | 72  | 2                    | 4321,4                | 2,2               | 2,42               |
| UDEC4       | 250 mM NaCl | 72  | 3                    | 5774,6                | 2,22              | 2,41               |
| UDEC4       | 250 mM NaCl | 120 | 1                    | 2282,4                | 2,17              | 2,51               |
| UDEC4       | 250 mM NaCl | 120 | 2                    | 7011,6                | 2,17              | 2,41               |
| UDEC4       | 250 mM NaCl | 120 | 3                    | 5366,3                | 2,21              | 2,42               |
